# Supplementary material for: Isolation and characterization of two novel groups of kanamycin-resistance ColE1-like plasmids in Salmonella enterica serotypes from food animals
Source: PLoS One. 2018 Mar 7;13(3):e0193435. doi: 10.1371/journal.pone.0193435 (PMC5841774; doi:10.1371/journal.pone.0193435)
Supplement: S1 Table — (XLSX) [file pone.0193435.s001.xlsx]

## Sheet: All_strains_supporting_table
Year	BEAR_number	Serotype	Status	Product_class	Resistance_profile	NumResistant
2010	BEAR096949	Dublin	Slaughter	Ground Beef	Amp Chl Kan Str Fis Tet	6
2010	BEAR096953	Heidelberg	Slaughter	Young Chicken	Aug Amp Fox Tio Axo Chl Gen Kan Str Fis Tet	11
2010	BEAR096957	Reading	Slaughter	Market Hog	Amp Kan Str Fis Tet Cot	6
2010	BEAR097281	Dublin	Slaughter	Ground Beef	Aug Amp Fox Tio Axo Chl Kan Str Fis Tet	10
2010	BEAR097283	Typhimurium	Slaughter	Ground Beef	Amp Kan Str Fis Tet	5
2010	BEAR097285	Dublin	Slaughter	Ground Beef	Aug Amp Fox Tio Axo Chl Kan Str Fis Tet	10
2010	BEAR096963	Dublin	Slaughter	Ground Beef	Chl Kan Str Fis Tet	5
2010	BEAR096969	Dublin	Slaughter	Ground Beef	Aug Amp Fox Tio Axo Chl Gen Kan Fis Tet	10
2010	BEAR096974	Dublin	Slaughter	Ground Beef	Aug Amp Fox Tio Axo Chl Gen Kan Fis Tet	10
2010	BEAR096976	Typhimurium var. 5	Slaughter	Ground beef	Aug Amp Fox Tio Axo Chl Kan Str Fis Tet Cot	11
2010	BEAR097664	Dublin	Slaughter	Ground Beef	Aug Amp Fox Tio Axo Chl Kan Str Fis Tet	10
2010	BEAR096987	Heidelberg	Slaughter	Market Hog	Kan Str Tet	3
2010	BEAR096992	Agona	Slaughter	Ground Beef	Aug Amp Fox Tio Axo Chl Kan Str Fis Tet Cot	11
2010	BEAR097678	Albert	Slaughter	Ground Turkey	Aug Amp Fox Tio Axo Chl Kan Nal Str Fis Tet	11
2010	BEAR097007	Typhimurium	Slaughter	Young Chicken	Aug Amp Fox Tio Axo Kan Fis Tet	8
2010	BEAR097309	Heidelberg	Slaughter	Young Chicken	Kan Str Tet	3
2010	BEAR097015	Typhimurium	Slaughter	Young Chicken	Aug Amp Fox Tio Axo Kan Fis Tet	8
2010	BEAR097679	Dublin	Slaughter	Ground Beef	Aug Amp Fox Tio Axo Chl Gen Kan Str Fis Tet	11
2010	BEAR097682	Dublin	Slaughter	Ground Beef	Aug Amp Tio Axo Chl Kan Str Fis Tet	9
2010	BEAR097686	Rough O:l,v:1,7	Slaughter	Ground Beef	Aug Amp Fox Tio Axo Chl Kan Str Fis Tet Cot	11
2010	BEAR097022	Dublin	Slaughter	Ground Beef	Aug Amp Fox Tio Axo Chl Kan Nal Str Fis Tet	11
2010	BEAR097695	Dublin	Slaughter	Ground Beef	Aug Amp Fox Tio Axo Chl Gen Kan Fis Tet	10
2010	BEAR097698	Dublin	Slaughter	Ground Beef	Aug Amp Fox Tio Axo Chl Kan Str Fis Tet	10
2010	BEAR097037	Typhimurium	Slaughter	Young Chicken	Aug Amp Fox Tio Axo Chl Gen Kan Str Fis Tet	11
2010	BEAR097049	Ohio	Slaughter	Market Hog	Kan Tet	2
2010	BEAR097053	Alachua	Slaughter	Turkey Carcass	Aug Amp Fox Tio Axo Gen Kan Str Fis Tet	10
2010	BEAR097056	Typhimurium var. 5	Slaughter	Young Chicken	Aug Amp Fox Tio Axo Kan Str Fis Tet	9
2010	BEAR097719	Brandenburg	Slaughter	Turkey Carcass	Aug Amp Fox Tio Axo Kan	6
2010	BEAR097639	Rough O:g,p:	Slaughter	Ground Beef	Aug Amp Fox Tio Axo Chl Kan Str Fis Tet	10
2010	BEAR097057	Dublin	Slaughter	Ground Chicken	Aug Amp Fox Tio Axo Chl Kan Str Fis Tet	10
2010	BEAR097064	I 4,[5],12:i:	Slaughter	Young Chicken	Kan Fis Tet	3
2010	BEAR097357	Typhimurium var. 5	Slaughter	Young Chicken	Kan Fis Tet	3
2010	BEAR097075	Enteritidis	Slaughter	Young Chicken	Amp Gen Kan Str Tet	5
2010	BEAR097733	Hadar	Slaughter	Turkey Carcass	Amp Kan Str Tet	4
2010	BEAR097734	I 4,[5],12:i:	Slaughter	Young Chicken	Amp Gen Kan Str Fis Tet	6
2010	BEAR097737	Infantis	Slaughter	Market Hog	Amp Kan Tet	3
2010	BEAR097738	Schwarzengrund	Slaughter	Turkey Carcass	Aug Amp Fox Tio Axo Kan	6
2010	BEAR097366	Heidelberg	Slaughter	Young Chicken	Kan Str Tet	3
2010	BEAR097087	Heidelberg	Slaughter	Market Hog	Kan Str Tet	3
2010	BEAR097096	Typhimurium var. 5	Slaughter	Young Chicken	Kan Fis Tet	3
2010	BEAR097095	Heidelberg	Slaughter	Turkey Carcass	Kan Str Tet	3
2010	BEAR097743	Montevideo	Slaughter	Ground Turkey	Gen Kan Str Fis Tet	5
2010	BEAR097370	Thompson	Slaughter	Young Chicken	Aug Amp Fox Tio Axo Chl Kan Str Fis Tet	10
2010	BEAR097758	Typhimurium	Slaughter	Young Chicken	Kan Fis Tet	3
2010	BEAR097125	Heidelberg	Slaughter	Young Chicken	Kan Str Tet	3
2010	BEAR097131	Typhimurium	Slaughter	Young Chicken	Aug Amp Fox Tio Axo Kan Fis Tet	8
2010	BEAR097408	Typhimurium	Slaughter	Market Hog	Amp Kan Str Fis Tet	5
2010	BEAR097791	Newport	Slaughter	Turkey Carcass	Aug Amp Fox Tio Axo Kan	6
2010	BEAR097792	Schwarzengrund	Slaughter	Turkey Carcass	Aug Amp Fox Tio Axo Kan	6
2010	BEAR097798	Senftenberg	Slaughter	Young Chicken	Gen Kan	2
2010	BEAR097810	Heidelberg	Slaughter	Turkey Carcass	Aug Amp Fox Tio Axo Kan Str Tet	8
2010	BEAR097819	Saintpaul	Slaughter	Turkey Carcass	Amp Chl Kan Str Fis Tet	6
2010	BEAR097822	Heidelberg	Slaughter	Ground Turkey	Amp Gen Kan Tet	4
2010	BEAR097827	Heidelberg	Slaughter	Ground Turkey	Amp Kan Str Tet	4
2010	BEAR097160	Agona	Slaughter	Market Hog	Aug Amp Fox Tio Axo Chl Kan Str Fis Tet	10
2010	BEAR099053	Dublin	Slaughter	Boneless Beef	Aug Amp Fox Tio Axo Chl Kan Str Fis Tet	10
2010	BEAR099055	Dublin	Slaughter	Boneless Beef	Aug Amp Fox Tio Axo Chl Kan Str Fis Tet	10
2010	BEAR099056	Dublin	Slaughter	Boneless Beef	Aug Amp Fox Tio Axo Chl Kan Str Fis Tet	10
2010	BEAR099057	Dublin	Slaughter	Boneless Beef	Aug Amp Fox Tio Axo Chl Kan Str Fis Tet	10
2010	BEAR097867	Infantis	Slaughter	Market Hog	Amp Kan Tet	3
2010	BEAR097868	Typhimurium	Slaughter	Young Chicken	Kan Fis Tet	3
2010	BEAR097831	Heidelberg	Slaughter	Ground Turkey	Amp Kan Str Tet	4
2010	BEAR097175	Heidelberg	Slaughter	Turkey Carcass	Aug Amp Fox Tio Axo Kan Str Fis Tet	9
2010	BEAR097876	Dublin	Slaughter	Ground Beef	Aug Amp Fox Tio Axo Chl Gen Kan	8
2010	BEAR097882	Infantis	Slaughter	Market Hog	Amp Kan Str Tet	4
2010	BEAR097483	Dublin	Slaughter	Ground Beef	Amp Kan Nal Str	4
2010	BEAR097182	Rough O:r:1,2	Slaughter	Turkey Carcass	Aug Amp Fox Tio Axo Kan Str Fis Tet	9
2010	BEAR097186	Schwarzengrund	Slaughter	Turkey Carcass	Amp Kan Str Fis Tet	5
2010	BEAR097188	Dublin	Slaughter	Ground Beef	Aug Amp Fox Tio Axo Chl Kan Nal Str Fis Tet	11
2010	BEAR097190	London	Slaughter	Market Hog	Amp Gen Kan Str Fis Tet	6
2010	BEAR097887	Heidelberg	Slaughter	Market Hog	Kan Str Tet	3
2010	BEAR097197	Schwarzengrund	Slaughter	Turkey Carcass	Kan Str Fis Tet	4
2010	BEAR097206	Heidelberg	Slaughter	Turkey Carcass	Aug Amp Fox Tio Axo Gen Kan Str Fis Tet	10
2010	BEAR097914	Montevideo	Slaughter	Ground Turkey	Amp Gen Kan Str Fis Tet	6
2010	BEAR097924	Heidelberg	Slaughter	Ground Beef	Aug Amp Fox Tio Axo Gen Kan Str Fis Tet	10
2010	BEAR097929	Heidelberg	Slaughter	Ground Turkey	Aug Amp Fox Tio Axo Kan Str Fis Tet	9
2010	BEAR097934	Senftenberg	Slaughter	Turkey Carcass	Amp Gen Kan Str Fis Tet	6
2010	BEAR097211	Dublin	Slaughter	Ground Beef	Amp Chl Kan Str Fis Tet	6
2010	BEAR097212	Enteritidis	Slaughter	Ground Beef	Amp Chl Kan Str Tet	5
2010	BEAR097559	Dublin	Slaughter	Ground Beef	Aug Amp Fox Tio Axo Chl Kan Str Fis Tet	10
2010	BEAR097220	Heidelberg	Slaughter	Ground Chicken	Aug Amp Fox Tio Axo Chl Gen Kan Str Fis	10
2010	BEAR097226	Heidelberg	Slaughter	Ground Chicken	Aug Amp Fox Tio Axo Chl Gen Kan Str Fis Tet	11
2010	BEAR097578	Dublin	Slaughter	Ground Beef	Aug Amp Fox Tio Axo Chl Kan Str Fis Tet	10
2010	BEAR097951	Johannesburg	Slaughter	Young Chicken	Gen Kan Str	3
2010	BEAR097238	Johannesburg	Slaughter	Ground Beef	Aug Amp Fox Tio Axo Chl Kan Str Fis Tet Cot	11
2010	BEAR097597	Typhimurium var. 5	Slaughter	Market Hog	Amp Chl Gen Kan Str Fis Tet	7
2010	BEAR097250	Dublin	Slaughter	Ground Beef	Aug Amp Fox Tio Axo Chl Kan Str Fis Tet Cot	11
2010	BEAR097253	Dublin	Slaughter	Ground Beef	Aug Amp Fox Tio Axo Chl Kan Str Fis Tet	10
2010	BEAR097607	Hadar	Slaughter	Ground Turkey	Amp Kan Tet	3
2010	BEAR097609	Dublin	Slaughter	Ground Beef	Aug Amp Fox Tio Axo Chl Gen Kan Fis	9
2010	BEAR097961	Rough O:g,p:	Slaughter	Ground Beef	Aug Amp Fox Tio Axo Chl Kan Nal Str Fis Tet	11
2010	BEAR097963	Dublin	Slaughter	Ground Beef	Aug Amp Fox Tio Axo Chl Gen Kan Fis Tet	10
2010	BEAR097612	Senftenberg	Slaughter	Ground Turkey	Aug Amp Fox Tio Axo Kan	6
2010	BEAR097614	Hadar	Slaughter	Ground Turkey	Amp Kan Tet	3
2010	BEAR097267	Heidelberg	Slaughter	Ground Chicken	Aug Amp Fox Tio Axo Chl Gen Kan Str Fis Tet	11
2010	BEAR098955	Heidelberg	Slaughter	Turkey Carcass	Aug Amp Fox Tio Axo Gen Kan Str Fis Tet	10
2010	BEAR098957	Heidelberg	Slaughter	Ground Chicken	Aug Amp Fox Tio Axo Chl Gen Kan Str Fis Tet	11
2010	BEAR098990	Hadar	Slaughter	Turkey Carcass	Amp Kan Str Tet	4
2010	BEAR099106	Dublin	Slaughter	Boneless Beef	Aug Amp Fox Tio Axo Chl Kan Str Fis Tet Cot	11
2010	BEAR099140	Dublin	Slaughter	Ground Beef	Aug Amp Fox Tio Axo Chl Kan Str Fis Tet	10
2010	BEAR099141	Poona	Slaughter	Ground Beef	Aug Amp Fox Tio Axo Chl Kan Str Fis Tet	10
2010	BEAR099143	Dublin	Slaughter	Boneless Beef	Aug Amp Fox Tio Axo Chl Gen Kan Nal Fis Tet	11
2010	BEAR099146	Anatum	Slaughter	Ground Beef	Aug Fox Tio Axo Chl Kan Str Fis Tet Cot	10
2010	BEAR099006	Schwarzengrund	Slaughter	Ground Turkey	Aug Amp Fox Tio Axo Kan	6
2010	BEAR099010	Senftenberg	Slaughter	Ground Turkey	Aug Amp Fox Tio Axo Chl Gen Kan Str Fis Tet	11
2010	BEAR098962	Dublin	Slaughter	Ground Beef	Aug Amp Fox Tio Axo Chl Gen Kan Fis Tet	10
2010	BEAR099013	Dublin	Slaughter	Raw Ground Beef	Aug Amp Fox Tio Axo Chl Kan Str Fis Tet	10
2010	BEAR099030	Dublin	Slaughter	Boneless Beef	Aug Amp Fox Tio Axo Chl Kan Str Fis Tet	10
2010	BEAR099032	Dublin	Slaughter	Boneless Beef	Chl Kan Str Fis Tet	5
2010	BEAR099033	Dublin	Slaughter	Boneless Beef	Chl Kan Str Fis Tet	5
2010	BEAR099035	Dublin	Slaughter	Coarse Ground Beef	Aug Amp Tio Axo Chl Kan Str Fis Tet	9
2010	BEAR099036	Dublin	Slaughter	Coarse Ground Beef	Aug Amp Fox Tio Axo Chl Kan Str Fis Tet	10
2011	BEAR099488	Heidelberg	Slaughter	Young Chicken	Aug Amp Fox Tio Axo Chl Gen Kan Str Fis Tet	11
2011	BEAR099509	Hadar	Slaughter	Ground Turkey	Amp Kan Tet	3
2011	BEAR099170	Dublin	Slaughter	Ground Beef	Aug Amp Fox Tio Axo Chl Gen Kan Fis Tet	10
2011	BEAR100358	Hadar	Slaughter	Turkey Carcass	Kan Tet	2
2011	BEAR099534	Heidelberg	Slaughter	Ground Turkey	Aug Amp Fox Tio Axo Kan Tet	7
2011	BEAR099180	Dublin	Slaughter	Ground Beef	Amp Chl Kan Str Fis Tet	6
2011	BEAR100379	Worthington	Slaughter	Ground Turkey	Aug Amp Fox Tio Axo Kan	6
2011	BEAR101101	Heidelberg	Slaughter	Turkey	Kan Str Tet	3
2011	BEAR099552	Heidelberg	Slaughter	Young Chicken	Aug Amp Fox Tio Axo Kan	6
2011	BEAR099912	Dublin	Slaughter	Ground Beef	Aug Amp Fox Tio Axo Chl Kan Nal Str Fis Tet	11
2011	BEAR099915	Dublin	Slaughter	Boneless Beef	Aug Amp Fox Tio Axo Kan Str Fis Tet	9
2011	BEAR099926	Dublin	Slaughter	Ground Beef	Aug Amp Fox Tio Axo Kan Str Fis Tet	9
2011	BEAR099927	Dublin	Slaughter	Ground Beef	Aug Amp Fox Tio Axo Kan Str Fis Tet	9
2011	BEAR099950	Dublin	Slaughter	Boneless Beef	Aug Amp Fox Tio Axo Chl Gen Kan Fis	9
2011	BEAR099188	Dublin	Slaughter	Ground Beef	Aug Amp Fox Tio Axo Chl Gen Kan Fis Tet	10
2011	BEAR099191	Dublin	Slaughter	Ground Beef	Aug Amp Fox Tio Axo Chl Gen Kan Fis Tet	10
2011	BEAR099204	Typhimurium	Slaughter	Market Hog	Amp Kan Str Fis Tet	5
2011	BEAR101205	Alachua	Slaughter	Turkey	Aug Amp Fox Tio Axo Chl Kan Str Fis Tet	10
2011	BEAR101208	Minnesota	Slaughter	Turkey	Aug Amp Fox Tio Axo Chl Kan Str Fis Tet	10
2011	BEAR101209	Alachua	Slaughter	Turkey	Aug Amp Fox Tio Axo Gen Kan Str Fis Tet	10
2011	BEAR101211	Schwarzengrund	Slaughter	Turkey	Aug Amp Fox Tio Axo Kan Str Fis Tet	9
2011	BEAR101213	Schwarzengrund	Slaughter	Turkey	Aug Amp Fox Tio Axo Kan Str Fis Tet	9
2011	BEAR099580	Dublin	Slaughter	Ground Beef	Amp Chl Gen Kan Str Fis Tet	7
2011	BEAR099215	Dublin	Slaughter	Ground Beef	Amp Chl Kan Str Fis Tet	6
2011	BEAR099953	Typhimurium	Slaughter	Ground Beef	Amp Chl Kan Str Fis Tet	6
2011	BEAR099954	Typhimurium	Slaughter	Ground Beef	Amp Chl Kan Str Fis Tet	6
2011	BEAR099955	Typhimurium	Slaughter	Ground Beef	Amp Chl Kan Str Fis Tet	6
2011	BEAR099956	Dublin	Slaughter	Boneless Beef	Chl Gen Kan Nal Fis	5
2011	BEAR099967	Dublin	Slaughter	Boneless Beef	Aug Amp Fox Tio Axo Chl Kan Str Fis Tet	10
2011	BEAR099968	Dublin	Slaughter	Boneless Beef	Aug Amp Fox Tio Axo Chl Gen Kan Fis	9
2011	BEAR099969	Dublin	Slaughter	Boneless Beef	Aug Amp Fox Tio Axo Chl Gen Kan Fis	9
2011	BEAR099599	Dublin	Slaughter	Ground Beef	Aug Amp Axo Chl Kan Str Fis Tet	8
2011	BEAR099240	Infantis	Slaughter	Market Hog	Amp Kan Str Tet	4
2011	BEAR099641	I 4,12:l,v:	Slaughter	Ground Turkey	Aug Amp Fox Tio Axo Kan	6
2011	BEAR099683	Agona	Slaughter	Ground Turkey	Aug Amp Fox Tio Axo Kan Fis Tet	8
2011	BEAR099972	Senftenberg	Slaughter	Turkey Burger	Aug Amp Fox Tio Axo Kan	6
2011	BEAR099975	Dublin	Slaughter	Ground Beef	Aug Amp Fox Tio Axo Chl Kan Str Fis Tet	10
2011	BEAR099982	Newport	Slaughter	Ground Beef	Aug Amp Fox Tio Axo Chl Kan Str Fis Tet	10
2011	BEAR099698	Newport	Slaughter	Ground Turkey	Aug Amp Fox Tio Axo Kan Fis Tet	8
2011	BEAR099296	Dublin	Slaughter	Ground Beef	Aug Amp Tio Axo Chl Kan Str Fis Tet	9
2011	BEAR099717	Orion var. 15+	Slaughter	Ground Turkey	Aug Amp Fox Tio Axo Kan	6
2011	BEAR099720	Infantis	Slaughter	Market Hog	Amp Kan Str Tet	4
2011	BEAR099305	Dublin	Slaughter	Ground Beef	Aug Amp Fox Tio Axo Chl Kan Str Tet	9
2011	BEAR100494	Dublin	Slaughter	Ground Beef	Chl Kan Nal Str Fis Tet	6
2011	BEAR100032	Heidelberg	Slaughter	Ground Turkey	Kan Str Tet	3
2011	BEAR100035	Heidelberg	Slaughter	Cattle	Kan Str Tet	3
2011	BEAR100022	Dublin	Slaughter	Ground Beef	Aug Amp Fox Tio Axo Chl Kan Str Fis Tet	10
2011	BEAR100023	Dublin	Slaughter	Ground Beef	Aug Amp Fox Tio Axo Chl Kan Str Fis Tet	10
2011	BEAR100024	Dublin	Slaughter	Ground Beef	Aug Amp Axo Chl Kan Str Fis Tet	8
2011	BEAR100057	Dublin	Slaughter	Ground Beef	Aug Amp Fox Tio Axo Chl Gen Kan Fis Tet	10
2011	BEAR100076	Dublin	Slaughter	Ground Beef	Aug Amp Fox Tio Axo Chl Kan Str Fis Tet	10
2011	BEAR100081	Montevideo	Slaughter	Ground Beef	Aug Amp Fox Tio Axo Chl Kan Str Fis Tet	10
2011	BEAR100082	Montevideo	Slaughter	Ground Beef	Aug Amp Fox Tio Axo Chl Kan Str Fis Tet Cot	11
2011	BEAR099790	Johannesburg	Slaughter	Young Chicken	Amp Kan Tet	3
2011	BEAR100551	Dublin	Slaughter	Ground Beef	Aug Amp Fox Tio Axo Chl Kan Str Fis Tet	10
2011	BEAR101099	Heidelberg	Slaughter	Turkey	Kan Str Tet	3
2011	BEAR099400	Dublin	Slaughter	Ground Beef	Aug Amp Fox Tio Axo Chl Kan Nal Str Fis Tet	11
2011	BEAR100122	Dublin	Slaughter	Ground Beef	Chl Gen Kan Nal Fis	5
2011	BEAR100130	Dublin	Slaughter	Ground Beef	Amp Kan Str Fis	4
2011	BEAR100131	Dublin	Slaughter	Ground Beef	Amp Kan Str Fis	4
2011	BEAR100132	Dublin	Slaughter	Ground Beef	Amp Kan Str Fis	4
2011	BEAR100133	Dublin	Slaughter	Ground Beef	Amp Kan Str Fis	4
2011	BEAR100167	Dublin	Slaughter	Ground Beef	Amp Chl Kan Str Fis Tet	6
2011	BEAR100169	Dublin	Slaughter	Ground Beef	Aug Amp Fox Tio Axo Chl Kan Str Fis Tet Cot	11
2011	BEAR100170	Heidelberg	Slaughter	Ground Beef	Aug Amp Fox Tio Axo Chl Kan Nal Str Fis Tet Cot	12
2011	BEAR100574	Dublin	Slaughter	Ground Beef	Chl Gen Kan Fis Tet	5
2011	BEAR100576	Typhimurium var. 5	Slaughter	Ground Beef	Amp Kan Str Fis Tet	5
2011	BEAR100208	Dublin	Slaughter	Ground Beef	Aug Amp Fox Tio Axo Chl Gen Kan Fis Tet	10
2011	BEAR100211	Dublin	Slaughter	Ground Beef	Aug Amp Tio Axo Chl Kan Str Fis Tet	9
2011	BEAR099415	Newport	Slaughter	Ground Beef	Aug Amp Fox Tio Axo Chl Kan Str Fis Tet	10
2011	BEAR099430	Dublin	Slaughter	Ground Beef	Aug Amp Fox Tio Axo Chl Kan Str Fis Tet Cot	11
2011	BEAR099431	Dublin	Slaughter	Ground Beef	Amp Kan Str Fis Tet	5
2011	BEAR100598	Dublin	Slaughter	Ground Beef	Aug Amp Fox Tio Axo Chl Gen Kan Fis Tet	10
2011	BEAR100608	Dublin	Slaughter	Ground Beef	Aug Amp Fox Tio Axo Chl Gen Kan Fis Tet	10
2011	BEAR101122	Muenster	Slaughter	Ground Turkey	Kan Str Tet	3
2011	BEAR101127	Heidelberg	Slaughter	Ground Turkey	Aug Amp Fox Tio Axo Kan Str Fis Tet	9
2011	BEAR101131	Senftenberg	Slaughter	Ground Turkey	Aug Amp Fox Tio Axo Kan Str Fis Tet	9
2011	BEAR101135	Saintpaul	Slaughter	Ground Turkey	Aug Amp Fox Tio Axo Kan Str Tet	8
2011	BEAR099439	Dublin	Slaughter	Ground Beef	Amp Kan Str Fis Tet	5
2011	BEAR101138	Senftenberg	Slaughter	Turkey	Aug Amp Fox Tio Axo Kan Str Fis Tet	9
2011	BEAR101139	Heidelberg	Slaughter	Turkey	Aug Amp Fox Tio Axo Gen Kan Str Fis Tet	10
2011	BEAR101141	Heidelberg	Slaughter	Turkey	Amp Axo Gen Kan Str Tet	6
2011	BEAR101143	Heidelberg	Slaughter	Turkey	Gen Kan Str	3
2011	BEAR101156	Senftenberg	Slaughter	Turkey	Amp Gen Kan Str Fis Tet	6
2011	BEAR100253	Dublin	Slaughter	Raw Ground Beef	Amp Chl Gen Kan Nal Fis Tet	7
2011	BEAR099878	Typhimurium	Slaughter	Ground Beef	Amp Chl Kan Str Fis Tet	6
2011	BEAR101164	Heidelberg	Slaughter	Turkey	Amp Gen Kan Tet	4
2011	BEAR101165	Senftenberg	Slaughter	Turkey	Kan Str Fis Tet	4
2011	BEAR101167	Agona	Slaughter	Turkey	Amp Gen Kan Str Fis Tet	6
2011	BEAR101172	Infantis	Slaughter	Turkey	Aug Amp Fox Tio Axo Chl Kan Str Fis Tet	10
2011	BEAR101176	Heidelberg	Slaughter	Turkey	Aug Amp Fox Tio Axo Gen Kan Str Fis Tet	10
2011	BEAR101182	Senftenberg	Slaughter	Ground turkey	Aug Amp Fox Tio Axo Kan	6
2011	BEAR101189	Alachua	Slaughter	Turkey	Aug Amp Fox Tio Axo Gen Kan Str Fis Tet	10
2011	BEAR101192	Newport	Slaughter	Turkey	Aug Amp Fox Tio Axo Kan Str Fis Tet Cot	10
2011	BEAR099893	Montevideo	Slaughter	Turkey Carcass	Amp Gen Kan Str	4
2011	BEAR100282	Dublin	Slaughter	Boneless Beef	Aug Amp Axo Chl Kan Str Fis Tet	8
2011	BEAR100283	Dublin	Slaughter	Boneless Beef	Aug Amp Tio Axo Chl Kan Str Fis Tet	9
2011	BEAR100284	Dublin	Slaughter	Turkey	Chl Kan Str Fis Tet	5
2011	BEAR100300	Dublin	Slaughter	Cattle	Aug Amp Fox Tio Axo Chl Gen Kan Fis Tet	10
2011	BEAR100301	Dublin	Slaughter	Cattle	Aug Amp Fox Tio Axo Chl Gen Kan Fis Tet	10
2011	BEAR100302	Dublin	Slaughter	Boneless Beef	Aug Amp Fox Tio Axo Chl Gen Kan Fis Tet	10
2011	BEAR100303	Dublin	Slaughter	Cattle	Aug Amp Fox Tio Axo Chl Gen Kan Fis Tet	10
2011	BEAR100304	Dublin	Slaughter	Boneless Beef	Aug Amp Fox Tio Axo Chl Gen Kan Fis Tet	10
2011	BEAR101216	Saintpaul	Slaughter	Turkey Carcass	Aug Amp Fox Tio Axo Kan	6
2011	BEAR101217	Senftenberg	Slaughter	Turkey Carcass	Aug Amp Fox Tio Axo Kan Str	7
2011	BEAR101221	4,5,12:r:	Slaughter	Ground Turkey	Amp Gen Kan Str Tet	5
2011	BEAR101228	Dublin	Slaughter	Cattle	Aug Amp Fox Tio Axo Chl Kan Str Fis Tet Cot	11
2011	BEAR101229	Dublin	Slaughter	Cattle	Aug Amp Fox Tio Axo Chl Kan Str Fis Tet Cot	11
2011	BEAR101230	Dublin	Slaughter	Cattle	Aug Amp Fox Tio Axo Chl Kan Str Fis Tet Cot	11
2011	BEAR101231	Dublin	Slaughter	Cattle	Aug Amp Fox Tio Axo Chl Kan Str Fis Tet Cot	11
2011	BEAR101232	Heidelberg	Slaughter	Cattle	Aug Amp Fox Tio Axo Chl Kan Str Fis Tet Cot	11
